# Supplementary material
Source: MDPI journal article supplement (https://www.mdpi.com/2311-5637/8/10/541)
Supplement: s1 [file s1]

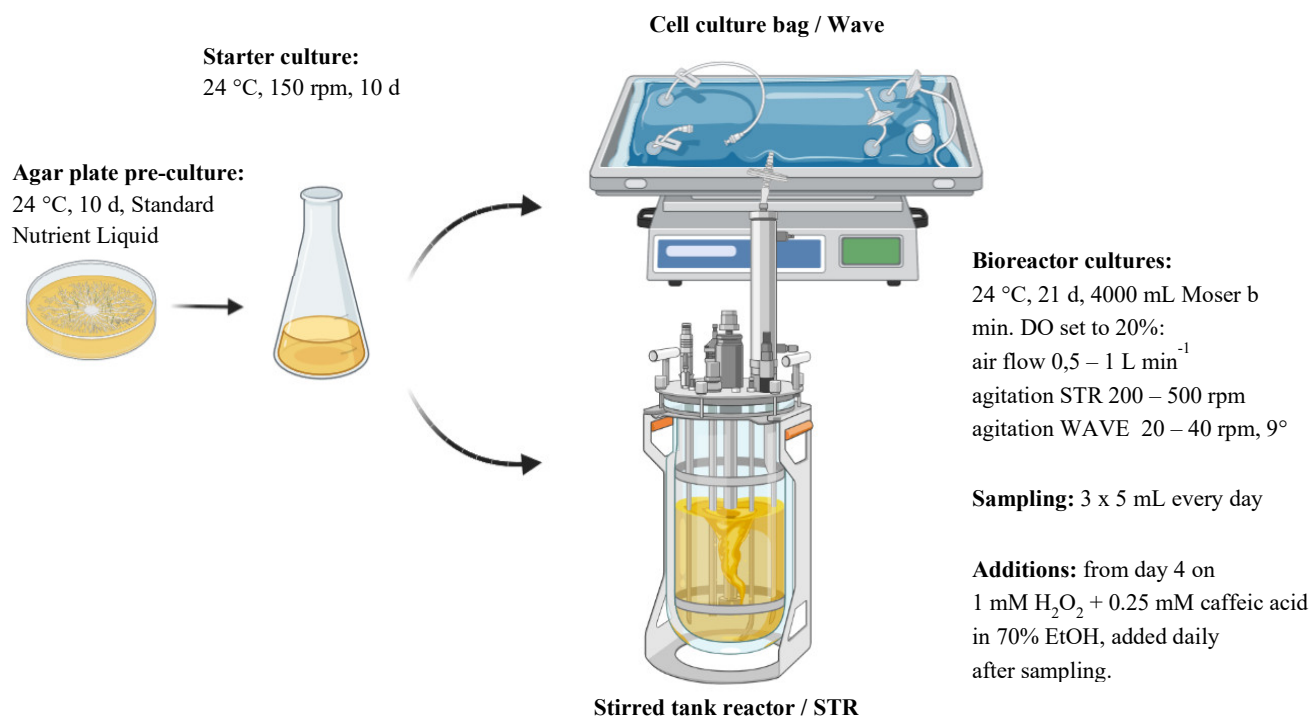

**Scheme S1.** Overview of the experimental steps to inoculate the two bioreactor types with mycelia from the same pre-culture, and operating conditions for the comparison of the two bioreactors for hispidin production.

**Table S1.** Pictures of the silk samples over time.

| time [h]           | 0 | 1 | 6 | 12 | 24 | 48 |
|--------------------|---|---|---|----|----|----|
| Reference          |   |   |   |    |    |    |
| <i>I. hispidus</i> |   |   |   |    |    |    |
| dye's madder       |   |   |   |    |    |    |

|           |                                                                                   |                                                                                   |                                                                                   |                                                                                    |                                                                                     |
|-----------|-----------------------------------------------------------------------------------|-----------------------------------------------------------------------------------|-----------------------------------------------------------------------------------|------------------------------------------------------------------------------------|-------------------------------------------------------------------------------------|
| Dylon     |  |  |  |  |  |
| Marabu    |  |  |  |  |  |
| Simplicol |  |  |  |  |  |

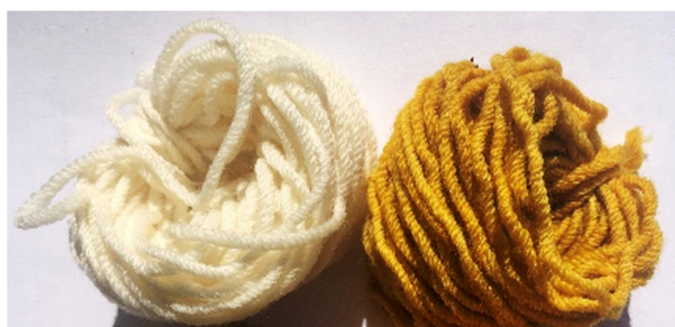

**Figure S1.** Left: undyed wool, right: wool dyed with *I. hispidus* submerged culture.
